# Supplementary material for: Genetic Diversity Linked to Haplotype Variation in the World Core Collection of Trifolium subterraneum for Boron Toxicity Tolerance Provides Valuable Markers for Pasture Breeding
Source: Front Plant Sci. 2019 Aug 30;10:1043. doi: 10.3389/fpls.2019.01043 (PMC6729137; doi:10.3389/fpls.2019.01043)
Supplement: Supplementary file 9 [file Table_1.xlsx]

## Sheet: Table S1
SUPPLEMENTARY TABLE S1| Boron toxicity score for 125 diversity germplasm panel population T. subterraneum with the centre of origin, passport, and BioClim data availability details
Line number	Line name	GRC Identity	Category	Subspecies*	Source	Origin	Ecogeographic core	Agromorphological core	Molecular core-97 members	Latitude	Longitude	Altitude	Rainfall (mm)	Soil pH	Soil texture**	BIO1 Annual Mean Temperature (⁰C)***	BIO2 (Mean diurnal range) (⁰C)***	BIO3 (Isothermality) (⁰C)***	BIO4 (Temp seasonality) (⁰C)***	BIO5 (Max temp warmest month) (⁰C)***	BIO6 (Min temp coldest month) (⁰C)***	BIO7 (Temp annual range) (⁰C)***	BIO8 (Mean temp wettest Quarter) (⁰C)***	Bio9 (Mean temp driest Quarter) (⁰C)***	BIO10 (Mean temp warmest Quarter) (⁰C)***	BIO11 (Mean temp coldest Quarter) (⁰C)***	BIO12 (Annual Precipitation) (mm)***	BIO13 (Precipitation of wettest month) (mm)***	BIO14 (Precipitation of driest month) (mm)***	BIO15 (Precipitation seasonality) (mm)***	BIO16 (Precipitation of wettest Quarter) (mm)***	BIO17 (Precipitation of driest Quarter) (mm)***	BIO18 (Precipitation of warmest Quarter) (mm)***	BIO19 (Precipitation of coldest Quarter) (mm)***	Selected for preliminary experiment (Boron)	Boron Toxicity Score
1	L01	3477	Core	S	ATGRC	Italy	Yes	Yes	Yes	40.7	9.06	240	700	6	1	15.6	7.7	3.3	538.8	28.6	5.7	22.9	13.3	22.5	22.8	9.1	634	96	6	55	268	41	58	235		1.35
2	L02	CPI 026814	Core	B	ATGRC	Israel	Yes	Yes	Yes	32.72	35.39	200	600	*	*	20.1	10.4	4.2	560.8	32.8	8.1	24.7	12.9	26.5	26.7	12.9	517	138	0	108	345	0	1	303		3.34
3	L03	CPI 039344	Core	B	ATGRC	Greece	No	Yes	Yes	39.88	20.63	460	*	*	*	12.6	10.5	3.6	638.7	29	-0.1	29.1	5.9	21	21	4.6	1169	180	27	53	504	95	95	464		2.82
4	L04	CPI 039375	Core	S	ATGRC	Yugoslavia	Yes	Yes	Yes	42.82	22.13	300	*	*	*	9.9	10.5	3.4	710.6	26.3	-4.3	30.6	13.6	2	18.7	0.4	570	66	37	17	170	122	143	132		3.08
5	L05	CPI 047284	Core	S	ATGRC	Italy	Yes	Yes	Yes	38.59	16.28	800	1500	6	1	13.7	6.9	3.1	547.4	26.1	4	22.1	8.8	20.7	20.9	7.2	924	140	20	53	387	70	103	362		1.63
6	L06	CPI 012869F	Core	S	ATGRC	Morocco	Yes	Yes	Yes	33.87	6.87	3	*	*	*	21.8	13.4	3.7	771.3	40.8	5.2	35.6	16.8	31.8	31.8	12	84	11	0	42	29	5	5	25		1.65
7	L07	CPI 014326J	Core	S	ATGRC	Greece	Yes	Yes	Yes	39.75	22.37	69	*	*	*	15.7	12.2	3.6	725.6	34.1	0.7	33.4	12	25.2	25.2	6.6	473	59	15	35	174	63	63	142		2.06
8	L08	CPI 019450B(UNI)	Core	B	ATGRC	Israel	Yes	Yes	Yes	32.72	35.39	200	600	7.2	*	20.1	10.4	4.2	560.8	32.8	8.1	24.7	12.9	26.5	26.7	12.9	517	138	0	108	345	0	1	303	*	3.58
9	L09	CPI 019459C	Core	S	ATGRC	Morocco	Yes	Yes	Yes	34.29	-6.6	20	500	*	1	18	9.7	4.5	408.7	28.6	7.4	21.2	13.7	23	23.2	12.7	575	116	0	79	293	7	10	270		2.03
10	L10	CPI 039329B	Core	S	ATGRC	Greece	Yes	Yes	Yes	39.7	21.6	216	*	*	*	14.3	11.9	3.5	723.3	32.7	-0.5	33.2	10.6	23.2	23.6	5	734	104	19	40	264	83	84	262		1.45
11	L11	CPI 047270D	Core	S	ATGRC	Italy	Yes	Yes	Yes	39.51	16.4	745	1000	6	1	13.7	6.3	2.8	568.3	26.3	4.2	22.1	11.3	21.1	21.2	7	869	124	17	49	352	76	101	317		2.48
12	L12	CPI 056897B	Core	S	ATGRC	Tunisia	Yes	Yes	Yes	37.15	9.47	338	750	5.5	2	*	*	*	*	*	*	*	*	*	*	*	*	*	*	*	*	*	*	*		1.9
13	L13	CPI 065190J	Core	S	ATGRC	Tunisia	Yes	Yes	Yes	36.75	8.68	650	1000	7	2	16.4	11.9	3.9	630.9	33.8	3.9	29.9	8.7	24.5	24.8	8.7	997	161	5	63	452	38	64	452		1.26
14	L14	CPI 069987C	Core	S	ATGRC	Turkey	Yes	Yes	Yes	36.7	29.2	680	1500	8	*	15.6	12.5	4	647.6	32.6	2	30.6	7.6	24	24	7.6	862	201	5	92	511	26	26	511		1.02
15	L15	CPI 069990A	Core	S	ATGRC	Turkey	Yes	Yes	Yes	36.3	29.5	1250	2000	9	3	12.9	11.2	3.7	670.4	29.5	-0.5	30	4.5	21.5	21.5	4.5	751	163	8	84	427	30	36	427		1.5
16	L16	CPI 070003D	Core	S	ATGRC	Turkey	Yes	Yes	Yes	40.98	39.82	30	1600	6	2	13.3	7.6	3.1	582.5	25.7	1.9	23.8	11.3	20.7	20.8	6.1	893	114	43	28	313	162	179	215		1.48
17	L17	CPI 070081C	Core	B	ATGRC	Turkey	Yes	Yes	Yes	40.04	26.63	300	*	*	*	13.6	10.4	3.6	655.9	29.7	0.9	28.8	7.2	22.1	22.1	5.6	703	123	12	60	321	52	52	312		1.67
18	L18	CPI 070114A	Core	B	ATGRC	Turkey	Yes	Yes	Yes	38.4	27.03	20	*	6.7	*	16	10.3	3.6	637.5	31.6	3.6	28	8.2	24.4	24.4	8.2	706	147	3	83	388	15	15	388		2.67
19	L19	CPI 070116A	Core	B	ATGRC	Turkey	Yes	Yes	Yes	38.36	26.78	5	*	9	3	16.9	9.8	3.6	612.1	31.8	4.9	26.9	9.4	24.9	24.9	9.4	653	138	2	85	367	10	10	367	*	3.1
20	L20	CPI 083878E	Core	S	ATGRC	Greece	Yes	Yes	Yes	35.23	24.88	1300	1200	6.5	*	11.3	7.1	3.2	543.7	23.3	1.5	21.8	4.8	18.4	18.4	4.7	1015	212	5	81	537	28	28	483		1.85
21	L21	CPI 083910G	Core	S	ATGRC	Greece	Yes	Yes	Yes	37.13	22.44	320	1000	7	2	15	9.9	3.8	567.7	29.4	3.7	25.7	9.7	22.4	22.4	8.1	747	139	8	71	371	30	30	343		3.45
22	L22	CPI 083917B	Core	B	ATGRC	Greece	Yes	Yes	Yes	37.82	22.15	470	1600	6.5	1	13.2	10.9	3.9	600	28.9	1.1	27.8	7.4	21	21	5.9	842	146	13	63	392	52	52	370		1.36
23	L23	CPI 083927B	Core	B	ATGRC	Greece	Yes	Yes	Yes	38.54	21.41	20	900	6.5	*	16.7	10	3.6	610.6	31.9	4.5	27.4	10.7	24.6	24.6	9.2	909	152	11	65	423	45	45	390		1.67
24	L24	CPI 083931A	Core	S	ATGRC	Greece	Yes	Yes	Yes	38.71	21.33	80	700	*	1	16.4	10.2	3.6	626.1	32	4	28	10.1	24.5	24.5	8.7	945	157	13	63	432	52	52	404	*	2.01
25	L25	CPI 083945C	Core	S	ATGRC	Greece	Yes	Yes	Yes	39.6	20.86	480	900	6.7	*	13.2	10.9	3.6	646.3	29.9	0.2	29.7	6.4	21.6	21.6	5.1	1069	165	24	52	458	90	90	423	*	1.69
26	L26	CPI 083966G	Core	S	ATGRC	Greece	Yes	Yes	Yes	39.65	20.54	150	1400	*	*	14.2	10.4	3.6	622.3	30.1	1.7	28.4	7.7	22.3	22.3	6.4	1175	189	19	60	527	73	73	487		2.34
27	L27	CPI 083982E	Core	S	ATGRC	Greece	Yes	Yes	Yes	39.22	22.08	145	700	7	4	15.4	11.5	3.5	704.6	33.2	1.2	32	6.5	24.2	24.5	6.5	708	109	14	45	273	70	73	273		2.95
28	L28	CPI 083990D	Core	S	ATGRC	Greece	Yes	Yes	Yes	39.11	22.03	570	1300	6	*	14	11.3	3.5	692	31.6	0.2	31.4	6.8	22.6	23	5.3	761	115	16	45	294	77	81	293	*	3.22
29	L29	CPI 084452A	Core	S	ATGRC	Spain	Yes	Yes	Yes	39.14	-6.6	350	500	*	*	16.3	11.3	3.8	620.1	33.8	4.1	29.7	9.5	24.5	24.5	8.7	538	71	4	51	206	35	35	194		1.87
30	L30	CPI 089752H	Core	S	ATGRC	Italy	Yes	Yes	Yes	39.09	8.74	130	800	6	1	15.9	8.8	3.7	525.4	29.2	5.7	23.5	11	22.7	23	9.8	574	83	4	57	234	25	52	225		2.88
31	L31	CPI 089762C	Core	B	ATGRC	Italy	Yes	Yes	Yes	39.3	8.76	60	675	7	5	16.2	9.3	3.8	534.2	30	5.6	24.4	13.9	23.1	23.3	9.9	527	77	4	56	212	25	50	199	*	2.45
32	L32	CPI 089764A	Core	B	ATGRC	Italy	Yes	Yes	Yes	39.35	8.62	260	925	8	1	14.1	8.3	3.5	548	27.9	4.2	23.7	9	21.2	21.5	7.8	726	107	7	56	300	39	62	287		2.48
33	L33	CPI 089771F	Core	B	ATGRC	Italy	Yes	Yes	Yes	39.4	8.47	330	750	7.5	3	14.5	8.1	3.5	532.1	27.9	4.8	23.1	9.6	21.4	21.7	8.4	730	111	6	58	308	35	60	289		1.58
34	L34	CPI 089792F	Core	S	ATGRC	Italy	Yes	Yes	Yes	40.36	8.78	660	975	5.5	3	13.3	8	3.3	574.7	27.6	3.4	24.2	7.8	20.9	21.1	6.6	894	137	8	57	373	58	68	351		3.31
35	L35	CPI 089809F	Core	S	ATGRC	Italy	Yes	Yes	Yes	40.7	9.04	200	700	5.5	1	15.6	7.7	3.3	538.8	28.6	5.7	22.9	13.3	22.5	22.8	9.1	634	96	6	55	268	41	58	235		1.78
36	L36	CPI 089809P	Core	S	ATGRC	Italy	Yes	Yes	Yes	40.7	9.04	200	700	5.5	1	15.6	7.7	3.3	538.8	28.6	5.7	22.9	13.3	22.5	22.8	9.1	634	96	6	55	268	41	58	235		2.79
37	L37	CPI 089862F	Core	S	ATGRC	Italy	Yes	Yes	Yes	40.58	9.18	700	1000	5.5	1	13.3	7.3	3.1	568.7	26.9	3.5	23.4	10.7	20.8	21	6.7	776	117	10	52	309	58	69	292		3.06
38	L38	CPI 089862K	Core	S	ATGRC	Italy	Yes	Yes	Yes	40.58	9.18	700	1000	5.5	1	13.3	7.3	3.1	568.7	26.9	3.5	23.4	10.7	20.8	21	6.7	776	117	10	52	309	58	69	292		1.17
39	L39	CPI 089921G	Core	S	ATGRC	Italy	Yes	Yes	Yes	39.35	9.55	10	575	5.5	2	16.7	7.2	3.3	515.9	29.2	7.5	21.7	14.8	23.4	23.8	10.9	346	49	3	51	139	21	49	103		1.2
40	L40	CPI 089931B	Core	S	ATGRC	Italy	Yes	Yes	Yes	39.35	9.47	250	850	6	2	15.7	7.5	3.3	534.1	28.7	6.3	22.4	13.6	22.7	23	9.7	405	56	5	49	159	26	54	143		2.75
41	L41	CPI 089936C	Core	S	ATGRC	Italy	Yes	Yes	Yes	39.28	9.33	150	475	6.5	1	16	7.9	3.4	528.6	29.1	6.3	22.8	13.9	22.9	23.2	10	397	53	4	50	156	23	50	142		1.81
42	L42	CPI 103903B	Core	S	ATGRC	Spain	Yes	Yes	Yes	40.8	-5.5	840	600	5.5	1	11.8	11.7	3.9	612.2	29.2	-0.2	29.4	7.8	19.8	20.1	4.4	418	50	11	33	134	56	58	116		1.06
43	L43	CPI 103957A	Core	B	ATGRC	Portugal	Yes	Yes	Yes	37.67	-8.15	260	550	6.5	2	16.2	10.3	4.2	473.6	30.4	6.2	24.2	11.4	22.2	22.7	10.6	567	86	2	63	252	23	23	245		2.75
44	L44	CPI 103958B	Core	S	ATGRC	Portugal	Yes	Yes	Yes	37.63	-8.23	200	570	6	2	16.2	10.1	4.2	461	30	6.4	23.6	11.5	22	22.5	10.7	565	87	2	64	254	22	23	246		0.29
45	L45	CPI 103970B	Core	S	ATGRC	Portugal	Yes	Yes	Yes	37.86	-8.17	220	550	5.7	2	16.6	10.3	4.2	470.3	30.8	6.7	24.1	11.8	22.5	23	11	559	84	2	63	246	23	23	240		1.77
46	L46	CPI 129836D	Core	S	ATGRC	France	Yes	Yes	Yes	42.16	8.78	460	850	5.8	1	13.7	6.7	3.2	507.2	25.3	4.6	20.7	11.7	20.3	20.5	7.7	712	100	11	45	281	63	88	234		1.57
47	L47	CPI 129909K	Core	S	ATGRC	France	Yes	Yes	Yes	44.11	-0.3	100	900	5.7	1	12.4	10.8	4.2	540.9	26.3	0.7	25.6	6.2	19.2	19.2	5.4	948	107	54	16	288	197	197	271		0.75
48	L48	CPI 129929B	Core	S	ATGRC	France	Yes	Yes	Yes	44.83	-0.75	40	820	7	1	12.6	9.9	4.1	516.5	25.7	1.8	23.9	6.7	19.1	19.1	5.9	963	108	53	20	307	187	187	282		2.1
49	L49	2006ISR32SUB.2	Core	S	ATGRC	Israel	Yes	Yes	Yes	33.21	35.77	1100	1070	5.5	2	14.8	9.6	3.6	608.7	28.6	2.4	26.2	6.7	21.9	21.9	6.7	740	176	0	105	479	1	1	479		1.75
50	L50	3455-B	Core	S	ATGRC	Italy	Yes	Yes	Yes	39.16	9.45	410	500	6	1	16.6	7	3.2	513.7	28.9	7.5	21.4	14.7	23.3	23.6	10.8	329	46	3	51	126	17	48	104		2.12
51	L51	3494-D	Core	S	ATGRC	Italy	Yes	Yes	Yes	40.33	9.3	570	700	6.5	1	14.2	7.7	3.2	562.9	27.9	4.4	23.5	11.7	21.6	21.8	7.6	700	109	8	52	284	50	64	263		2.02
52	L52	48980a	Core	S	Old subs	Portugal	Yes	Yes	Yes	41.18	-6.93	675	600	*	*	27.3	15.7	5.9	276.2	39.5	12.9	26.6	26.9	23.7	31	23.7	537	189	0	140	433	0	82	0		2.34
53	L53	CC12/7/4	Core	S	ATGRC	Spain	Yes	Yes	Yes	38.46	-6.05	450	600	5.8	*	16	12	3.8	651.5	34.5	3.1	31.4	8.9	24.6	24.6	8	577	76	4	54	221	30	30	210		2.58
54	L54	DAM002WHITE-B	Core	B	ATGRC	Greece	Yes	Yes	Yes	39.17	23.48	50	*	7.5	1	16.5	9.2	3.3	658.2	31.8	4.1	27.7	10.1	25.2	25.2	8.5	503	77	12	50	206	47	47	198		1.86
55	L55	DAM002WHITE-H	Core	B	ATGRC	Greece	Yes	Yes	Yes	39.17	23.48	50	*	7.5	1	16.5	9.2	3.3	658.2	31.8	4.1	27.7	10.1	25.2	25.2	8.5	503	77	12	50	206	47	47	198		2.55
56	L56	DAM031-A	Core	B	ATGRC	Greece	Yes	Yes	Yes	39.11	26.27	250	*	8.5	1	15.7	8.2	3.3	603.6	29.7	4.9	24.8	8.5	23.7	23.7	8.5	651	134	5	79	347	23	23	347		2.67
57	L57	DAM038T.SUB	Core	S	ATGRC	Greece	Yes	Yes	Yes	38.96	26.39	15	*	8	1	16.1	8.3	3.3	605.5	30.3	5.2	25.1	8.9	24.2	24.2	8.9	661	138	4	81	359	19	19	359		1.37
58	L58	DGI007	Core	S	ATGRC	Italy	Yes	No	Yes	39.44	16.3	580	700	6.5	1	15.3	6.5	2.9	555.4	27.6	5.8	21.8	13	22.4	22.6	8.7	865	126	15	51	355	68	97	322		2.67
59	L59	EP001BRACHY-A	Core	B	ATGRC	Italy	Yes	Yes	Yes	39.3	9.16	94	500	7.9	4	16.3	8.8	3.7	525	29.5	5.9	23.6	14.1	23.1	23.3	10.1	420	56	3	52	166	21	46	153		2.01
60	L60	EP001BRACHY-C	Core	B	ATGRC	Italy	Yes	Yes	Yes	39.3	9.16	94	500	7.9	4	16.3	8.8	3.7	525	29.5	5.9	23.6	14.1	23.1	23.3	10.1	420	56	3	52	166	21	46	153		2.1
61	L61	EP002BRACHY-C	Core	B	ATGRC	Italy	Yes	Yes	Yes	39.39	9.16	170	550	7.8	4	16	8.9	3.6	538.1	29.7	5.6	24.1	13.7	23	23.2	9.7	448	60	4	51	176	26	50	162		2.35
62	L62	EP006BRACHY-B	Core	B	ATGRC	Italy	Yes	Yes	Yes	39.53	9.1	160	580	8.5	5	15.7	8.8	3.6	547.5	29.6	5.3	24.3	13.3	22.8	23	9.3	495	71	5	51	199	30	54	180		2.78
63	L63	EP040SUB-I	Core	S	ATGRC	Italy	Yes	Yes	Yes	40.04	8.93	540	725	*	1	14.1	8.2	3.3	568.8	28.3	4	24.3	11.5	21.5	21.7	7.4	772	121	8	55	317	51	65	299		1.51
64	L64	EP058SUB-H	Core	S	ATGRC	Italy	Yes	Yes	Yes	40.42	8.74	488	875	7.1	4	14.3	8.1	3.3	563.4	28.4	4.3	24.1	11.8	21.7	21.9	7.7	804	128	6	57	342	49	63	311		1.83
65	L65	EP058SUB-L	Core	S	ATGRC	Italy	Yes	Yes	Yes	40.42	8.74	488	875	7.1	4	14.3	8.1	3.3	563.4	28.4	4.3	24.1	11.8	21.7	21.9	7.7	804	128	6	57	342	49	63	311		2.63
66	L66	EP099BISBRACHY-H	Core	B	ATGRC	Italy	Yes	Yes	Yes	40.17	8.93	265	700	6	3	15.8	8.4	3.5	544.6	29.5	5.6	23.9	13.4	22.9	23.1	9.4	642	100	5	57	276	38	56	242		1.91
67	L67	EP111BRACHYSUB-C	Core	S	ATGRC	Italy	Yes	Yes	Yes	39.36	9.57	40	575	6.6	2	16.7	7.2	3.3	515.9	29.2	7.5	21.7	14.8	23.4	23.8	10.9	346	49	3	51	139	21	49	103		2.08
68	L68	EP116SUB-A	Core	S	ATGRC	Italy	Yes	Yes	Yes	39.42	9.24	550	880	6.3	5	14.5	8.2	3.4	560.2	28.5	4.6	23.9	12.1	21.9	22.1	8.1	538	80	7	50	211	37	60	200		3.06
69	L69	EP118SUB-B	Core	S	ATGRC	Italy	Yes	Yes	Yes	39.51	9.25	650	880	6.4	5	14.5	8	3.3	561.4	28.4	4.5	23.9	12	21.8	22.1	8	539	82	7	50	212	38	61	200		1.8
70	L70	EP118SUB-F	Core	S	ATGRC	Italy	Yes	Yes	Yes	39.51	9.25	650	880	6.4	5	14.5	8	3.3	561.4	28.4	4.5	23.9	12	21.8	22.1	8	539	82	7	50	212	38	61	200		1.77
71	L71	EP128BRACHY-A	Core	B	ATGRC	Italy	Yes	Yes	Yes	40.11	9.28	990	950	6.2	2	11.6	7.2	3	589.3	25.6	1.6	24	4.8	19.5	19.6	4.8	870	128	11	51	330	62	72	330		2.65
72	L72	EP141-6136BRACHY-D	Core	B	ATGRC	Italy	Yes	Yes	Yes	40.58	9.1	800	950	6.3	1	12.9	7.3	3.1	572.4	26.5	3	23.5	10.2	20.4	20.6	6.1	824	123	10	52	326	61	71	312		2.08
73	L73	EP142SUB-N	Core	S	ATGRC	Italy	Yes	Yes	Yes	40.54	9.22	640	980	5.5	2	13.3	7.3	3.1	568.7	26.9	3.5	23.4	10.7	20.8	21	6.7	776	117	10	52	309	58	69	292		3.51
74	L74	EP144SUB-B	Core	S	ATGRC	Italy	Yes	Yes	Yes	40.43	9.14	270	725	7.3	5	15	7.9	3.3	552.8	28.5	5	23.5	12.5	22.2	22.4	8.5	683	105	7	55	285	46	61	257		4.05
75	L75	L074-B	Core	S	ATGRC	Italy	Yes	Yes	Yes	37.9	15.05	550	1000	7.5	3	13.9	7	3	582	27.1	3.9	23.2	11.6	21.6	21.6	7.2	634	96	13	53	258	46	80	209		1.74
76	L76	LO1983	Core	S	Spain main	Spain	Yes	Yes	Yes	43.22	-8.25	93	*	*	*	13.6	7.4	4.1	361.9	23.6	5.6	18	9.8	18.1	18.5	9.2	1134	153	33	40	426	128	148	396		2.37
77	L77	LO3460	Core	S	Spain main	Spain	Yes	Yes	Yes	38.72	-3.97	738	*	*	*	14	12.7	3.8	690.8	33.9	0.5	33.4	12.2	23.4	23.4	5.8	507	65	5	46	180	37	37	160		2.33
78	L78	LO3591	Core	S	Spain main	Spain	Yes	Yes	Yes	38.38	-6.8	566	*	*	*	15.2	11.3	3.8	602.4	32.4	3.3	29.1	8.8	23.1	23.3	8	621	84	4	54	244	35	37	234		0.69
79	L79	LO5336	Core	B	Spain main	Bulgaria	Yes	Yes	Yes	*	*	28	*	*	*	*	*	*	*	*	*	*	*	*	*	*	*	*	*	*	*	*	*	*		1.75
80	L80	LO7307 (GMM-10)	Core	S	Spain 2006	Spain	Yes	Yes	Yes	39.58	-5.55	621	*	5.8	3	14.7	11.6	3.7	662.9	33.2	2	31.2	7.5	23.6	23.6	6.7	475	58	6	45	164	38	38	152		0.44
81	L81	LO0490	Core	B	ATGRC	Spain	Yes	Yes	Yes	38.68	-7.05	260	600	*	*	16.6	11.4	3.9	589.3	33.5	4.7	28.8	10.3	24.3	24.4	9.4	542	75	4	52	213	34	35	203		2.63
82	L82	LO1121	Core	B	ATGRC	Spain	Yes	Yes	Yes	38.32	-4.32	700	*	*	*	15.1	12.2	3.6	695.8	34.7	1.7	33	7.9	24.5	24.5	6.7	584	84	5	52	216	31	31	204		2.89
83	L83	LO1216	Core	S	ATGRC	Spain	Yes	Yes	Yes	38.9	-6.33	240	*	*	*	16.7	11.7	3.8	636.8	34.7	4.1	30.6	9.7	25.1	25.1	8.9	498	65	3	52	189	29	29	177		0.81
84	L84	MCD070T.SUB-B	Core	S	ATGRC	Morocco	Yes	Yes	Yes	33.49	-6.17	900	700	7	2	16.8	14.2	4.4	590.5	34.5	2.9	31.6	10.5	24.4	24.7	9.6	547	86	1	67	229	13	16	227		2.16
85	L85	Oekotyp-Nr.273.3	Core	S	DEU IPK	Morocco	Yes	Yes	Yes	33.83	-6.53	326	*	*	*	17.7	12.3	4.5	502.8	32.5	5.5	27	12.5	24	24.4	11.5	500	88	0	72	225	7	10	219		1.51
86	L86	Perugia 1214.3	Core	B	Perugia	Italy	Yes	Yes	Yes	42.74	10.37	46	*	*	*	15.2	6.3	2.9	535	27.3	6.1	21.2	12.9	22.1	22.4	8.9	587	80	12	41	223	65	94	176		2.56
87	L87	PI 535700.4	Core	S	GRIN	Tunisia	Yes	Yes	Yes	37.77	8.92	100	1000	5.9	*	17.7	9.7	3.9	553.6	31.6	6.8	24.8	11	24.6	25.1	11	854	156	4	68	408	26	53	408		3.1
88	L88	S3356-I	Core	S	ATGRC	Italy	Yes	Yes	Yes	37.9	15.05	550	1000	7.5	3	13.9	7	3	582	27.1	3.9	23.2	11.6	21.6	21.6	7.2	634	96	13	53	258	46	80	209		1.29
89	L89	S3615-F	Core	S	ATGRC	Italy	Yes	Yes	Yes	38.38	14.98	400	500	*	1	17.2	6.9	3.1	528.5	29.6	7.9	21.7	15.4	24	24.4	11.1	650	95	11	54	262	41	82	220		1.26
90	L90	S3647-D	Core	B	ATGRC	Italy	Yes	Yes	Yes	38.03	15.13	770	900	*	4	15.2	7.1	3.1	563.9	28.1	5.4	22.7	13	22.6	22.8	8.7	672	98	13	52	271	48	85	225		1.55
91	L91	S3668-H	Core	B	ATGRC	Italy	Yes	Yes	Yes	37.98	15.2	860	900	*	3	13.6	6.9	3	576.7	26.6	3.7	22.9	11.3	21.2	21.3	6.9	682	99	15	52	274	52	86	226		2.81
92	L92	S3797-A	Core	B	ATGRC	Italy	Yes	Yes	Yes	37.65	14.55	480	550	*	4	15.6	7.7	3.2	565.9	28.8	5.3	23.5	13.4	22.9	23.1	9	496	84	7	57	214	30	59	158		3.55
93	L93	S3824-C	Core	S	ATGRC	Italy	Yes	Yes	Yes	37.73	14.37	840	750	*	4	14	6.7	2.8	594.6	27.3	4	23.3	11.5	21.8	21.9	7.1	490	78	9	54	204	34	63	171		2.01
94	L94	S3831-D	Core	B	ATGRC	Italy	Yes	Yes	Yes	37.83	14.48	950	750	*	4	13.8	6.7	2.8	596.8	27.2	3.8	23.4	11.4	21.7	21.7	6.9	512	80	10	53	210	37	37	164		1.08
95	L95	S3933-E	Core	B	ATGRC	Italy	Yes	Yes	Yes	37.93	14.05	440	650	*	4	14.7	6.5	2.8	575.2	27.6	5	22.6	12.4	22.3	22.4	8.1	520	76	8	54	215	33	63	169		2.25
96	L96	Coolamon	Core	S	DAFWA	Crossbred	No	No	Yes	*	*	*	*	*	*	*	*	*	*	*	*	*	*	*	*	*	*	*	*	*	*	*	*	*		0.65
97	L97	Urana	Core	S	DAFWA	Crossbred	No	No	Yes	*	*	*	*	*	*	*	*	*	*	*	*	*	*	*	*	*	*	*	*	*	*	*	*	*		1.75
98	Antas	EP019BRACHY-E	Cultivar	B	ATGRC	Italy	*	*	*	39.5	8.67	160	750	6.5	2	14.7	8.6	3.5	546	28.6	4.6	24	9.6	21.8	22.1	8.4	658	96	6	55	267	36	59	254		2.12
99	Bindoon	Bindoon	Cultivar	S	DAFWA	Crossbred	*	*	*	*	*	*	*	*	*	*	*	*	*	*	*	*	*	*	*	*	*	*	*	*	*	*	*	*		2.26
100	Campeda	EP056SUB-B	Cultivar	S	ATGRC	Italy	*	*	*	40.39	8.66	442	850	7.6	3	15.2	8.3	3.4	551.1	29	5.1	23.9	12.8	22.3	22.6	8.6	735	122	5	59	320	41	59	282		1.98
101	Clare	Clare	Cultivar	B	ATGRC	Australia (naturalised)	*	*	*	*	*	*	*	*	*	*	*	*	*	*	*	*	*	*	*	*	*	*	*	*	*	*	*	*		2.87
102	Daliak	Daliak	Cultivar	S	ATGRC	Australia (naturalised)	*	*	*	*	*	*	*	*	*	*	*	*	*	*	*	*	*	*	*	*	*	*	*	*	*	*	*	*	*	1.67
103	Dalkeith	Dalkeith	Cultivar	S	ATGRC	Australia (naturalised)	*	*	*	*	*	*	*	*	*	*	*	*	*	*	*	*	*	*	*	*	*	*	*	*	*	*	*	*		1.54
104	Denmark	CPI 089774F	Cultivar	S	ATGRC	Italy	*	*	*	39.51	8.55	80	750	6	1	15.1	8.1	3.5	533.8	28.4	5.3	23.1	10.1	22	22.3	8.9	672	105	6	57	281	33	57	260		2.03
105	Dinninup	Dinninup	Cultivar	S	ATGRC	Australia (naturalised)	*	*	*	*	*	*	*	*	*	*	*	*	*	*	*	*	*	*	*	*	*	*	*	*	*	*	*	*		2.53
106	Dwalganup	Dwalganup	Cultivar	S	ATGRC	Australia (naturalised)	*	*	*	*	*	*	*	*	*	*	*	*	*	*	*	*	*	*	*	*	*	*	*	*	*	*	*	*		0.79
107	Geraldton	Geraldton	Cultivar	S	ATGRC	Australia (naturalised)	*	*	*	*	*	*	*	*	*	*	*	*	*	*	*	*	*	*	*	*	*	*	*	*	*	*	*	*		1.39
108	Gosse	Gosse	Cultivar	Y	SARDI	Crossbred	*	*	*	*	*	*	*	*	*	*	*	*	*	*	*	*	*	*	*	*	*	*	*	*	*	*	*	*		2.51
109	Goulburn	CPI 089830F	Cultivar	S	ATGRC	Italy	*	*	*	40.86	9.12	500	1100	5	1	12.9	6.6	2.9	555.4	25.8	3.4	22.4	10.4	20.2	20.4	6.4	771	113	11	50	307	62	73	284		2.15
110	Izmir	CIZ008Sub-G	Cultivar	S	ATGRC	Turkey	*	*	*	38.58	27.1	110	*	6.5	2	16	11.1	3.7	681.2	32.7	2.9	29.8	7.6	25	25	7.6	706	141	5	77	370	23	23	370		1.16
111	Leura	CPI 089822H	Cultivar	S	ATGRC	Italy	*	*	*	40.98	9.15	550	950	5.7	1	14.1	6.7	3	538.6	26.5	4.8	21.7	11.8	21.1	21.4	7.7	686	101	9	51	280	53	67	250		1.42
112	Losa	EP100SUB-D	Cultivar	S	ATGRC	Italy	*	*	*	40.12	8.84	260	740	5.4	3	15.7	8.4	3.5	544.2	29.4	5.6	23.8	13.3	22.8	23	9.3	650	103	5	58	281	36	55	248		2.67
113	Mintaro	Mintaro	Cultivar	B	SARDI	Crossbred	*	*	*	*	*	*	*	*	*	*	*	*	*	*	*	*	*	*	*	*	*	*	*	*	*	*	*	*		2.22
114	Mt Barker	Mt Barker	Cultivar	S	ATGRC	Australia (naturalised)	*	*	*	*	*	*	*	*	*	*	*	*	*	*	*	*	*	*	*	*	*	*	*	*	*	*	*	*		1.08
115	Napier	Napier	Cultivar	Y	DAFWA	Crossbred	*	*	*	*	*	*	*	*	*	*	*	*	*	*	*	*	*	*	*	*	*	*	*	*	*	*	*	*		0.92
116	Narrikup	Narrikup	Cultivar	S	DAFWA	Crossbred	*	*	*	*	*	*	*	*	*	*	*	*	*	*	*	*	*	*	*	*	*	*	*	*	*	*	*	*		2.08
117	Nungarin	Nungarin	Cultivar	S	DAFWA	Crossbred	*	*	*	*	*	*	*	*	*	*	*	*	*	*	*	*	*	*	*	*	*	*	*	*	*	*	*	*		3.94
118	Riverina	Riverina	Cultivar	Y	DAFWA	Crossbred	*	*	*	*	*	*	*	*	*	*	*	*	*	*	*	*	*	*	*	*	*	*	*	*	*	*	*	*		1.86
119	Rosabrook	Rosabrook	Cultivar	S	DAFWA	Crossbred	*	*	*	*	*	*	*	*	*	*	*	*	*	*	*	*	*	*	*	*	*	*	*	*	*	*	*	*		2.94
120	Rosedale	CPI 070124B	Cultivar	B	ATGRC	Turkey	*	*	*	38.53	27.13	450	*	8.5	2	15.1	10.7	3.7	662.6	31.2	2.3	28.9	6.9	23.7	23.7	6.9	739	149	5	78	393	23	23	393		2.43
121	Seaton Park	Seaton Park	Cultivar	S	ATGRC	Australia (naturalised)	*	*	*	*	*	*	*	*	*	*	*	*	*	*	*	*	*	*	*	*	*	*	*	*	*	*	*	*		2.19
122	Trikkala	Trikkala	Cultivar	Y	DAFWA	Crossbred	*	*	*	*	*	*	*	*	*	*	*	*	*	*	*	*	*	*	*	*	*	*	*	*	*	*	*	*	*	1.81
123	Woogenellup	Woogenellup	Cultivar	S	ATGRC	Australia (naturalised)	*	*	*	*	*	*	*	*	*	*	*	*	*	*	*	*	*	*	*	*	*	*	*	*	*	*	*	*	*	1.95
124	Yarloop	Yarloop	Cultivar	Y	ATGRC	Australia (naturalised)	*	*	*	*	*	*	*	*	*	*	*	*	*	*	*	*	*	*	*	*	*	*	*	*	*	*	*	*	*	1.67
125	York	CPI 089846B	Cultivar	S	ATGRC	Italy	*	*	*	40.95	9.5	50	675	5.5	1	15.8	7.3	3.3	505.5	27.7	6	21.7	13.8	22.3	22.6	9.8	543	78	6	50	221	39	56	195		2.07
			CAT. & SSP		SOURCE & ORIGIN		CORE CRITERIA			PASSPORT DATA						*BIOCLIM																				Boron
*Subspecies : S= subterraneum, Y= yanninicum, B= brachcalycinum
**Soil texture rated as 1= sand, 2= sandy loam, 3= loam, 4= clay loam and 5= loam.
***Bioclimatic variables are derived from the monthly temperature and rainfall values in order to generate more biologically meaningful variables. These are often used in ecological niche modeling (e.g., BIOCLIM, GARP). The bioclimatic variables represent annual trends (e.g., mean annual temperature, annual precipitation) seasonality (e.g., annual range in temperature and precipitation) and extre…

## Sheet: Table S2
SUPPLEMENTARY TABLE S2| Nutrient solution component concentration used for hydroponic system (adapted from Hoagland and Arnon 1938)
Stock	Compound	Final concentration (μM)	MW	Amount of compound (g L-1)	Stock concentration (mM)	Volume per L to add (mL)
A	KNO3	6500	101.11	82.15	812	8
	Ca(NO3)2.4H2O	4000	236.16	118.08	500
B	NH4H2PO4	2000	115.03	2.88	25	8
	MgSO4.7H2O	2000	246.47	61.62	250
C	MnSo4.H2O	0.5	169.02	0.0845	0.5	1
	ZnSO4.7H2O	0.2	287.54	0.055	0.2
	MoNa2O4.2H2O	0.1	241.95	0.169	0.1
	CuSO4.5H2O	0.2	249.7	0.05	0.2
D	C10H12FeN2NaO8	45	367.05	16.517	45	1
Source: Hoagland and Arnon (1938).

## Sheet: Table S3
SUPPLEMENTARY TABLE S3| Visual scoring system based on the appearance and severity of leaf symptoms of boron toxicity in T. subterraneum (adapted from Bagheri et al., 1992)
Score	Leaf symptoms
0	No apparent symptoms
0.5	Chlorosis on tips of oldest leaves, no marginal necrosis
1	Tip necrosis on the oldest leaf
1.5	Tip necrosis on one leaf and 2nd leaf with chlorosis on tips
2	Tip necrosis on two leaves
2.5	Tip necrosis on two leaves and leaves with chlorosis on tips
3	Tip necrosis on three leaves
3.5	Tip necrosis on three leaves and leaves with chlorosis on tips
4	Tip necrosis on four leaves
4.5	Tip necrosis on four leaves and leaves with chlorosis on tips
5	Tip necrosis on five leaves
5.5	All leaves with marginal necrosis except youngest leaves
6	Plant wilted
7	All leaves dropped only stem remains green
8	Plant dead

## Sheet: Table S4
SUPPLEMENTARY TABLE S4| Correlations between boron toxicity symptom score and continuous variables (latitude, longitude, altitude, soil pH and 19 BioClim variables)
Variable	R-Square	P-value
Latitude	0.000204115	0.886106
Longitude	0.028513	0.0881811
Altitude	0.0079871	0.366953								1
Soil pH	0.0114397	0.361066								1
BIO1.Annual Mean Temperature (⁰C)	0.0052528	0.469124								1
BIO2.Mean Diurnal Range	0.00910086	0.340195								1
BIO3.Isothermality	0.00206675	0.650034								1
BIO4.Temperature Seasonality	0.000604955	0.806161								1
BIO5.Max Temperature of Warmest Month (⁰C)	0.000810595	0.776367								1
BIO6.Min Temperature of Coldest Month (⁰C)	0.00970665	0.324544								1
BIO7.Temperature Annual Range (⁰C)	0.00796939	0.372249								1
BIO8.Mean Temperature of Wettest Quarter (⁰C)	0.00961856	0.32676								1
BIO9.Mean Temperature of Driest Quarter (⁰C)	0.00235234	0.628327								1
BIO10.Mean Temperature of Warmest Quarter (⁰C)	0.00279194	0.59789								1
BIO11.Mean Temperature of Coldest Quarter (⁰C)	0.00478193	0.489807								1
BIO12.Annual Precipitation (mm)	0.000787165	0.779539								1
BIO13.Precipitation of Wettest Month (mm)	0.00774558	0.379076								1
BIO14.Precipitation of Driest Month (mm)	0.00474357	0.491558								1
BIO15.Precipitation Seasonality (Coefficient of Variation)	0.0150418	0.219436								1
BIO16.Precipitation of Wettest Quarter (mm)	0.00466173	0.495327								1
BIO17.Precipitation of Driest Quarter (mm)	0.00486387	0.486102								1
BIO18.Precipitation of Warmest Quarter (mm)	0.00099157	0.753381								1
BIO19.Precipitation of Coldest Quarter (mm)	0.00219226	0.640283								1
										1
										1
										1

## Sheet: Table S5
SUPPLEMENTARY TABLE S5| Analysis of variance one-way ANOVA test among boron toxicity tolerance and non-continuous variables (subspecies, core vs cultivars, country of origin and soil texture)
Source of variation	d.f.	Sum of Squares	Mean Square	F-value	P-value
Subspecies	2	4.58	2.29	4.3652	0.01476
Residual	122	64.001	0.5246
Core vs Cultivars	1	0.163	0.16271	0.2925	0.5896
Residual	123	68.418	0.55625
Country of origin	13	9.943	0.76485	1.4478	0.1491
Residual	111	58.638	0.52827
Soil texture	4	2.814	0.70343	1.3492	0.2603
Residual	71	37.018	0.52138
